# Supplementary material
Source: PubMed Central journal article supplement (PMC3817153)
Supplement: rna-10-1312-s01.pdf [file rna-10-1312-s01.pdf]

## **Supplemental Material to:**

**Richard A. Burkhart, Danielle M. Pineda, Saswati N. Chand,  
Carmella Romeo, Eric R. Londin, Edward D. Karoly,  
Joseph A. Cozzitorto, Isidore Rigoutsos, Charles J. Yeo,  
Jonathan R. Brody, Jordan M. Winter**

**HuR is a post-transcriptional regulator of  
core metabolic enzymes in pancreatic cancer**

**2012; 10(8)**

**<http://dx.doi.org/10.4161/rna.25274>**

**[www.landesbioscience.com/journals/rnabiology/article/25274/](http://www.landesbioscience.com/journals/rnabiology/article/25274/)**

**A**      **Supplemental Figure 1**

cytoplasmic HuR

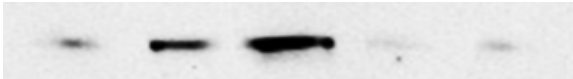

$\alpha$ -tubulin

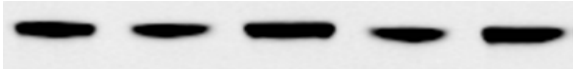

0      6      12      24      48

Time (hours)

# A Supplemental Figure 2

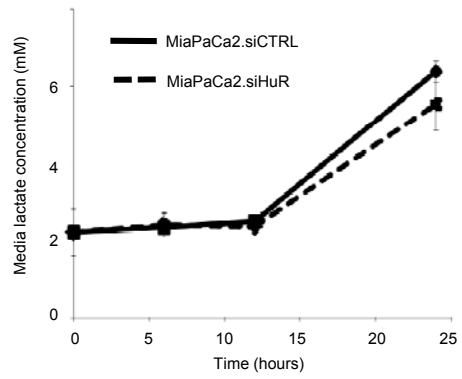

# B

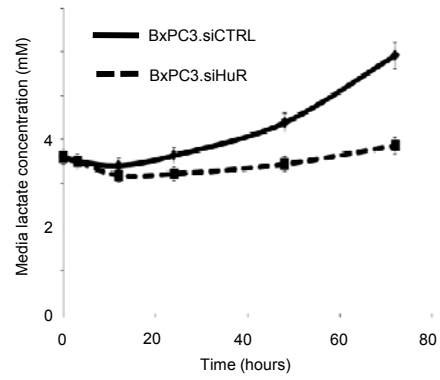

# C

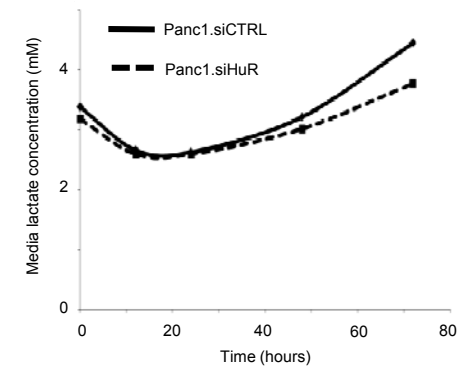

# E

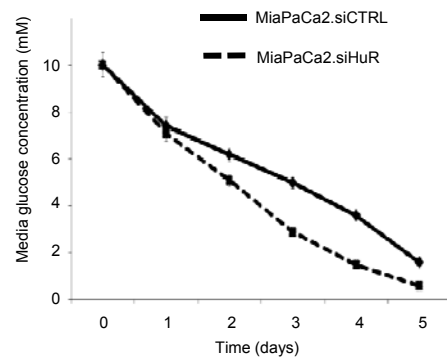

# F

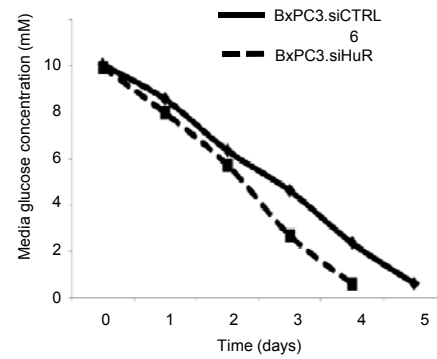

# G

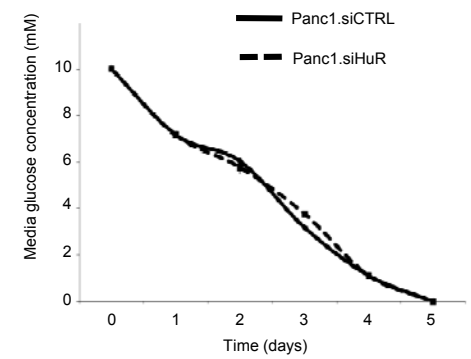

# A Supplemental Figure 3

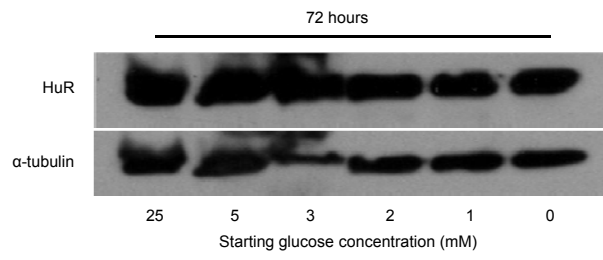

# B

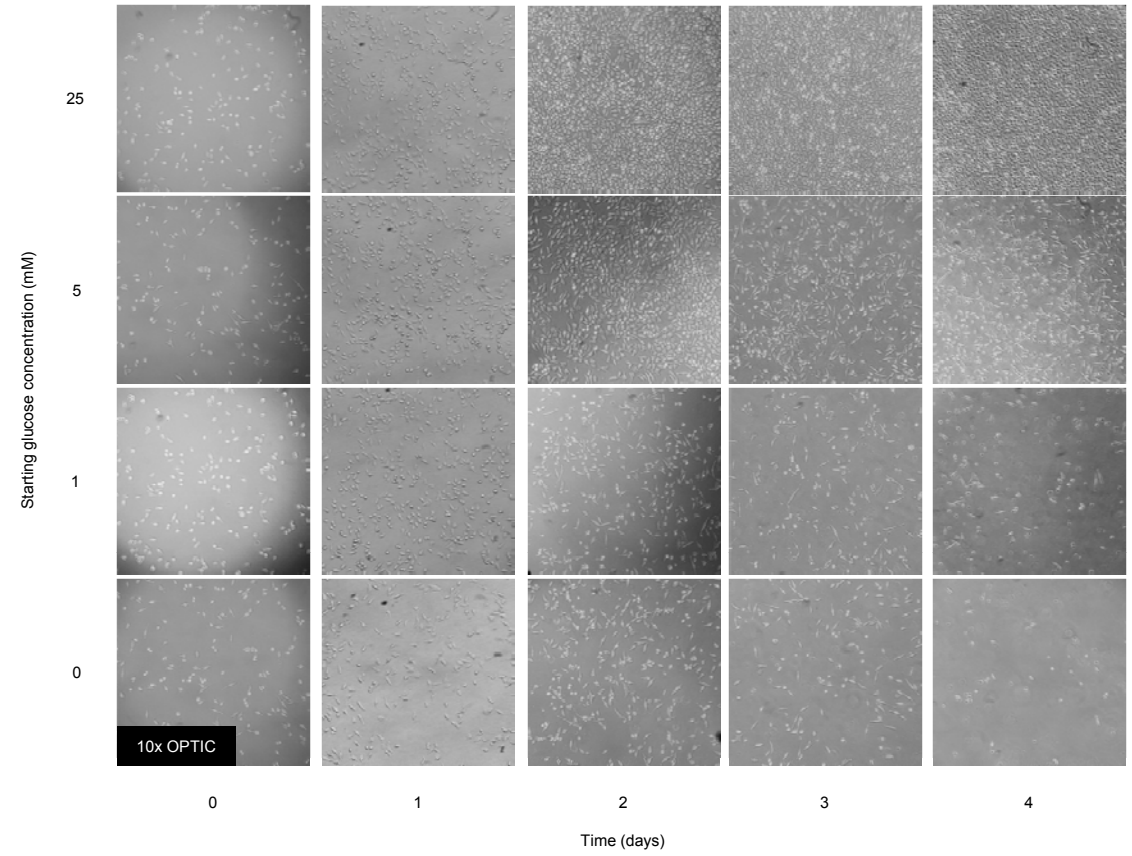

# Supplemental Figure 4

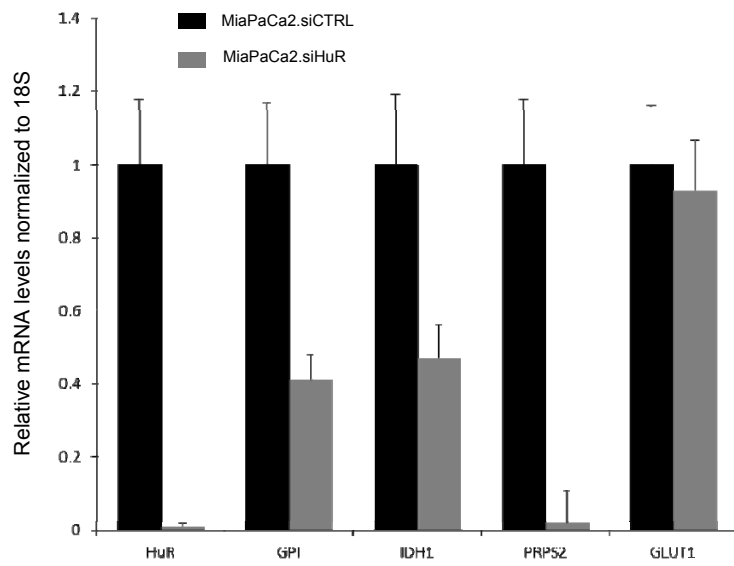

### **Supplemental Legends:**

#### **Supplemental Figure 1: Time course of HuR activation under glucose deprivation.**

Immunoblots of cytoplasmic lysates from MiaPaCa2 cells in 1 mM glucose at the indicated time points.

#### **Supplemental Figure 2: Lactate and glucose curves in pancreatic cancer related to HuR expression**

Replicate experiments of lactate and glucose levels in the media over time in three pancreatic cancer cell lines at 10 mM starting glucose concentration. siCTRL are solid lines; siHuR are dashed lines. Lactate levels in the media for (A) MiaPaCa2, (B) BxPC3, and (C) PANC1 cells. Media glucose concentration for (D) MiaPaCa2, (E) BxPC3, and (F) PANC1 cells.

#### **Supplemental Figure 3:**

(A) Immunoblot showing whole cell HuR protein expression at 72 hours under various levels of glucose deprivation. (B) Photomicrographs at 10x optic showing MiaPaCa2 cell growth over time when cultured in media with different starting glucose concentrations.

#### **Supplemental Figure 4:**

Quantitative PCR demonstrating HuR silenced cells (gray bars) versus control siRNA transfection (black bars). HuR target mRNA transcript levels (GPI, PRPS2, and IDH1) are shown and compared to a negative control (GLUT1). Data is normalized to 18s.

#### **Supplemental Table 1:**

Nomenclature used throughout manuscript to describe transfected cell lines.

#### **Supplemental Table 2:**

Pathway heat map (raw data) comparing metabolic intermediates in MiaPaCa2.siCTRL and MiaPaCa2.siHuR cells. Cells were incubated in DMEM with 25 mM glucose.

#### **Supplemental Table 3:**

Results of the glucose metabolism RNP-IP/qPCR Array (HuR vs. IgG antibodies). Genes in red are > 2-fold increase in the HuR group; genes in green are > 2-fold increase in the IgG group.

**Supplemental Table 1: Nomenclature used for transfected cell lines**

| <b>Name</b>     | <b>Transfection procedure</b>           |
|-----------------|-----------------------------------------|
| MiaPaCa2.siCTRL | siRNA transfection of scrambled control |
| MiaPaCa2.siHuR  | siRNA transfection against HuR          |
| MiaPaCa2.EV     | Plasmid transfection of empty vector    |
| MiaPaCa2.HuR    | Plasmid transfection of HuR             |
| BxPC3.siCTRL    | siRNA transfection of scrambled control |
| BxPC3.siHuR     | siRNA transfection against HuR          |
| PANC1.siCTRL    | siRNA transfection of scrambled control |
| PANC1.siHuR     | siRNA transfection against HuR          |
| PANC1.EV        | Plasmid transfection of empty vector    |
| PANC1.HuR       | Plasmid transfection of HuR             |



**Heat map of intracellular biochemicals profiled in this study.**  
**Normalization: Protein (Bradford assay)**

**Comparison mean values significantly different:**  
■  $p \leq 0.05$ , fold of change  $\geq 1.00$   
■  $p \leq 0.05$ , fold of change  $< 1.00$

**Comparison mean values approaching significance:**  
■  $0.05 < p < 0.10$ , fold of change  $\geq 1.00$   
■  $0.05 < p < 0.10$ , fold of change  $< 1.00$

| SUPER PATHWAY           | SUB PATHWAY                                   | BIOCHEMICAL NAME                   | siHuR<br>siCtrl | p-Value | q-Value |
|-------------------------|-----------------------------------------------|------------------------------------|-----------------|---------|---------|
| Amino acid              | Glycine, serine and threonine metabolism      | glycine                            | 0.91            | 0.1759  | 0.7021  |
|                         |                                               | serine                             | 0.96            | 0.6586  | 0.7543  |
|                         |                                               | N-acetyserine                      | 1.04            | 0.8173  | 0.7822  |
|                         |                                               | threonine                          | 0.76            | 0.0227  | 0.2941  |
|                         | Alanine and aspartate metabolism              | aspartate                          | 0.89            | 0.2374  | 0.7078  |
|                         |                                               | asparagine                         | 1.20            | 0.2616  | 0.7078  |
|                         |                                               | beta-alanine                       | 1.68            | 0.1769  | 0.7021  |
|                         |                                               | alanine                            | 1.12            | 0.2589  | 0.7078  |
|                         |                                               | N-acetylanine                      | 0.92            | 0.4816  | 0.7400  |
|                         |                                               | N-acetyl-aspartate (NAA)           | 1.11            | 0.5407  | 0.7509  |
|                         | Glutamate metabolism                          | glutamate                          | 0.72            | 0.0032  | 0.0828  |
|                         |                                               | glutamine                          | 0.80            | 0.0133  | 0.2290  |
|                         |                                               | gamma-aminobutyrate (GABA)         | 0.86            | 0.5903  | 0.7543  |
|                         |                                               | N-acetyl-aspartyl-glutamate (NAAG) | 1.01            | 0.6515  | 0.7543  |
|                         | Histidine metabolism                          | histidine                          | 0.89            | 0.0772  | 0.5662  |
|                         | Lysine metabolism                             | lysine                             | 1.00            | 0.7090  | 0.7543  |
|                         | Phenylalanine & tyrosine metabolism           | phenylalanine                      | 1.10            | 0.1897  | 0.7021  |
|                         |                                               | tyrosine                           | 1.08            | 0.3550  | 0.7285  |
|                         |                                               | 3-(4-hydroxyphenyl)lactate         | 1.20            | 0.1247  | 0.6459  |
|                         |                                               | phenylacetyl-glycine               | 1.02            | 0.9943  | 0.8120  |
|                         | Tryptophan metabolism                         | tryptophan                         | 1.05            | 0.7039  | 0.7543  |
|                         | Valine, leucine and isoleucine metabolism     | isoleucine                         | 1.07            | 0.4044  | 0.7285  |
|                         |                                               | leucine                            | 1.04            | 0.5258  | 0.7509  |
|                         |                                               | valine                             | 1.08            | 0.3371  | 0.7285  |
|                         | Cysteine, methionine, SAM, taurine metabolism | cysteine                           | 0.72            | 0.0333  | 0.4028  |
|                         |                                               | cystine                            | 1.23            | 0.8752  | 0.7822  |
|                         |                                               | cystathionine                      | 0.87            | 0.2310  | 0.7078  |
|                         |                                               | N-formylmethionine                 | 0.92            | 0.5422  | 0.7509  |
|                         |                                               | S-adenosylhomocysteine (SAH)       | 0.87            | 0.0524  | 0.4931  |
|                         |                                               | methionine                         | 1.09            | 0.3840  | 0.7285  |
|                         |                                               | N-acetylmethionine                 | 0.96            | 0.4401  | 0.7285  |
|                         |                                               | oleoyltaurine                      | 0.79            | 0.6520  | 0.7543  |
|                         | Urea cycle; arginine-, proline-, metabolism   | arginine                           | 0.84            | 0.4279  | 0.7285  |
|                         |                                               | ornithine                          | 1.15            | 0.4313  | 0.7285  |
|                         |                                               | proline                            | 0.90            | 0.1342  | 0.6459  |
|                         |                                               | citrulline                         | 0.92            | 0.2882  | 0.7285  |
|                         |                                               | trans-4-hydroxyproline             | 1.10            | 0.7832  | 0.7717  |
|                         | Creatine metabolism                           | creatine                           | 0.95            | 0.4087  | 0.7285  |
|                         | Polyamine metabolism                          | 5-methylthioadenosine (MTA)        | 0.73            | 0.0031  | 0.0828  |
|                         |                                               | glutathione, reduced (GSH)         | 0.74            | 0.0571  | 0.4931  |
|                         | Glutathione metabolism                        | 5-oxoproline                       | 0.87            | 0.1510  | 0.6678  |
|                         |                                               | glutathione, oxidized (GSSG)       | 0.79            | 0.0894  | 0.5790  |
|                         |                                               | cysteine-glutathione disulfide     | 0.67            | 0.0027  | 0.0828  |
|                         |                                               | glycylvaline                       | 0.93            | 0.7477  | 0.7573  |
|                         |                                               | glycylglycine                      | 1.07            | 0.5778  | 0.7543  |
|                         | Dipeptide                                     | glycylisoleucine                   | 1.15            | 0.6234  | 0.7543  |
|                         |                                               | glycylleucine                      | 1.10            | 0.8200  | 0.7822  |
|                         |                                               | alanylthreonine                    | 1.56            | 0.2610  | 0.7078  |
|                         |                                               | prolylleucine                      | 0.87            | 0.3063  | 0.7285  |
|                         |                                               | phenylalanylalanine                | 1.30            | 0.3561  | 0.7285  |
| phenylalanylglutamate   |                                               | 1.18                               | 0.6917          | 0.7543  |         |
| phenylalanylglycine     |                                               | 1.27                               | 0.4587          | 0.7394  |         |
| tyrosylvaline           |                                               | 1.63                               | 0.6336          | 0.7543  |         |
| histidylleucine         |                                               | 1.32                               | 0.5639          | 0.7543  |         |
| isoleucylalanine        |                                               | 1.17                               | 0.7572          | 0.7592  |         |
| isoleucylglycine        |                                               | 1.10                               | 0.6969          | 0.7543  |         |
| isoleucylserine         |                                               | 2.11                               | 0.0111          | 0.2234  |         |
| leucylglutamate         |                                               | 1.36                               | 0.3119          | 0.7285  |         |
| leucylglycine           |                                               | 1.86                               | 0.0555          | 0.4931  |         |
| phenylalanyls erine     |                                               | 1.47                               | 0.5231          | 0.7509  |         |
| serylleucine            |                                               | 1.30                               | 0.8313          | 0.7822  |         |
| serylphenylalanine      |                                               | 1.51                               | 0.1737          | 0.7021  |         |
| threonylleucine         |                                               | 1.54                               | 0.4668          | 0.7394  |         |
| tyrosylalanine          |                                               | 1.03                               | 0.7116          | 0.7543  |         |
| tyrosylglycine          |                                               | 1.18                               | 0.6338          | 0.7543  |         |
| serylisoleucine*        | 1.07                                          | 0.9278                             | 0.8010          |         |         |
| gamma-glutamyl          | gamma-glutamylvaline                          | 0.81                               | 0.2493          | 0.7078  |         |
|                         | gamma-glutamylleucine                         | 1.11                               | 0.8821          | 0.7822  |         |
|                         | gamma-glutamylisoleucine*                     | 0.91                               | 0.3454          | 0.7285  |         |
|                         | gamma-glutamylmethionine                      | 1.03                               | 0.9541          | 0.8015  |         |
|                         | gamma-glutamylglutamate                       | 0.75                               | 0.0416          | 0.4435  |         |
| gamma-glutamylglutamine | 0.77                                          | 0.0050                             | 0.1135          |         |         |

Peptide

|                                               |                                                              |                                                              |        |        |        |
|-----------------------------------------------|--------------------------------------------------------------|--------------------------------------------------------------|--------|--------|--------|
|                                               |                                                              | gamma-glutamylthreonine*                                     | 1.32   | 0.2367 | 0.7078 |
| Carbohydrate                                  | Aminosugars metabolism                                       | N-acetylglucosamine 6-phosphate                              | 1.00   | 0.9990 | 0.8122 |
|                                               |                                                              | erythronate*                                                 | 0.95   | 0.9594 | 0.8015 |
|                                               |                                                              | N-acetylneuraminic acid                                      | 1.10   | 0.3045 | 0.7285 |
|                                               | Fructose, mannose, galactose, starch, and sucrose metabolism | fructose                                                     | 1.38   | 0.5162 | 0.7509 |
|                                               |                                                              | sorbitol                                                     | 0.84   | 0.3767 | 0.7285 |
|                                               | Glycolysis, gluconeogenesis, pyruvate metabolism             | glycerate                                                    | 0.87   | 0.4403 | 0.7285 |
|                                               |                                                              | glucose-6-phosphate (G6P)                                    | 0.73   | 0.0151 | 0.2290 |
|                                               |                                                              | glucose                                                      | 7.61   | 0.0843 | 0.5662 |
|                                               |                                                              | fructose-6-phosphate                                         | 0.64   | 0.1448 | 0.6562 |
|                                               |                                                              | Isobar: fructose 1,6-diphosphate, glucose 1,6-diphosphate, m | 1.43   | 0.1339 | 0.6459 |
|                                               |                                                              | 2-phosphoglycerate                                           | 1.14   | 0.6569 | 0.7543 |
|                                               |                                                              | 3-phosphoglycerate                                           | 1.00   | 0.8170 | 0.7822 |
|                                               |                                                              | dihydroxyacetone phosphate (DHAP)                            | 1.39   | 0.4033 | 0.7285 |
|                                               |                                                              | phosphoenolpyruvate (PEP)                                    | 0.93   | 0.4306 | 0.7285 |
|                                               |                                                              | lactate                                                      | 1.26   | 0.2302 | 0.7078 |
|                                               | Nucleotide sugars, pentose metabolism                        | 6-phosphogluconate                                           | 0.57   | 0.0377 | 0.4275 |
|                                               |                                                              | sedoheptulose-7-phosphate                                    | 0.79   | 0.3868 | 0.7285 |
|                                               |                                                              | ribose                                                       | 0.81   | 0.1837 | 0.7021 |
|                                               |                                                              | ribose 5-phosphate                                           | 1.05   | 0.8596 | 0.7822 |
|                                               |                                                              | Isobar: ribulose 5-phosphate, xylulose 5-phosphate           | 0.96   | 0.6824 | 0.7543 |
| Energy                                        | Krebs cycle                                                  | citrate                                                      | 0.80   | 0.2364 | 0.7078 |
|                                               |                                                              | succinate                                                    | 0.85   | 0.4118 | 0.7285 |
|                                               |                                                              | succinylcarnitine                                            | 1.24   | 0.1270 | 0.6459 |
|                                               |                                                              | fumarate                                                     | 1.06   | 0.5037 | 0.7509 |
|                                               |                                                              | malate                                                       | 1.06   | 0.4420 | 0.7285 |
|                                               | Oxidative phosphorylation                                    | phosphate                                                    | 1.11   | 0.2799 | 0.7248 |
|                                               |                                                              | pyrophosphate (PPi)                                          | 1.44   | 0.3966 | 0.7285 |
|                                               |                                                              | linoleate (18:2n6)                                           | 1.02   | 0.9740 | 0.8039 |
|                                               |                                                              | linolenate [alpha or gamma; (18:3n3 or 6)]                   | 0.98   | 0.5938 | 0.7543 |
|                                               |                                                              | dihomo-linolenate (20:3n3 or n6)                             | 0.95   | 0.4632 | 0.7394 |
| Lipid                                         | Essential fatty acid                                         | eicosapentaenoate (EPA; 20:5n3)                              | 0.95   | 0.6146 | 0.7543 |
|                                               |                                                              | docosapentaenoate (n3 DPA; 22:5n3)                           | 0.98   | 0.6636 | 0.7543 |
|                                               |                                                              | docosahexaenoate (DHA; 22:6n3)                               | 0.89   | 0.1840 | 0.7021 |
|                                               |                                                              | caproate (6:0)                                               | 0.79   | 0.5745 | 0.7543 |
|                                               |                                                              | caprylate (8:0)                                              | 0.99   | 0.8687 | 0.7822 |
|                                               | Medium chain fatty acid                                      | pelargonate (9:0)                                            | 0.98   | 0.7055 | 0.7543 |
|                                               |                                                              | caprate (10:0)                                               | 0.84   | 0.0522 | 0.4931 |
|                                               |                                                              | laurate (12:0)                                               | 0.94   | 0.3597 | 0.7285 |
|                                               |                                                              | myristate (14:0)                                             | 1.01   | 0.8845 | 0.7822 |
|                                               | Long chain fatty acid                                        | myristoleate (14:1n5)                                        | 1.04   | 0.9348 | 0.8015 |
|                                               |                                                              | pentadecanoate (15:0)                                        | 1.32   | 0.1340 | 0.6459 |
|                                               |                                                              | palmitoleate (16:1n7)                                        | 1.00   | 0.8222 | 0.7822 |
|                                               |                                                              | margarate (17:0)                                             | 0.94   | 0.3815 | 0.7285 |
|                                               |                                                              | 10-heptadecenoate (17:1n7)                                   | 1.02   | 0.8762 | 0.7822 |
|                                               |                                                              | oleate (18:1n9)                                              | 1.05   | 0.6979 | 0.7543 |
|                                               |                                                              | cis-vaccenate (18:1n7)                                       | 1.09   | 0.4288 | 0.7285 |
|                                               |                                                              | 13-octadecenoate (18:1n5)                                    | 0.99   | 0.8679 | 0.7822 |
|                                               |                                                              | nonadecanoate (19:0)                                         | 0.94   | 0.4229 | 0.7285 |
|                                               |                                                              | 10-nonadecenoate (19:1n9)                                    | 0.99   | 0.7444 | 0.7573 |
|                                               |                                                              | eicosenoate (20:1n9 or 11)                                   | 1.01   | 0.9494 | 0.8015 |
| dihomo-linoleate (20:2n6)                     |                                                              | 0.97                                                         | 0.5338 | 0.7509 |        |
| arachidonate (20:4n6)                         |                                                              | 0.90                                                         | 0.2341 | 0.7078 |        |
| docosadienoate (22:2n6)                       |                                                              | 0.88                                                         | 0.0834 | 0.5662 |        |
| docosatienoate (22:3n3)                       |                                                              | 1.07                                                         | 0.3696 | 0.7285 |        |
| adrenate (22:4n6)                             | 0.95                                                         | 0.5883                                                       | 0.7543 |        |        |
| Fatty acid, monohydroxy                       | 2-hydroxystearate                                            | 1.06                                                         | 0.9756 | 0.8039 |        |
|                                               | 2-hydroxypalmitate                                           | 1.16                                                         | 0.5467 | 0.7509 |        |
| Fatty acid, amide                             | oleamide                                                     | 0.77                                                         | 0.7672 | 0.7600 |        |
| Fatty acid, branched                          | 15-methylpalmitate (isobar with 2-methylpalmitate)           | 1.11                                                         | 0.3461 | 0.7285 |        |
| Fatty acid metabolism (also BCAA metabolism)  | 17-methylstearate                                            | 1.11                                                         | 0.8594 | 0.7822 |        |
| Carnitine metabolism                          | butyrylcarnitine                                             | 0.91                                                         | 0.4983 | 0.7509 |        |
|                                               | deoxycarnitine                                               | 1.06                                                         | 0.6096 | 0.7543 |        |
|                                               | carnitine                                                    | 0.95                                                         | 0.4690 | 0.7394 |        |
|                                               | 3-dehydrocarnitine*                                          | 0.92                                                         | 0.6641 | 0.7543 |        |
| Glycerolipid metabolism                       | acetylcarnitine                                              | 1.13                                                         | 0.7300 | 0.7563 |        |
|                                               | choline phosphate                                            | 0.59                                                         | 0.0000 | 0.0010 |        |
|                                               | phosphoethanolamine                                          | 0.77                                                         | 0.4601 | 0.7394 |        |
|                                               | choline                                                      | 1.04                                                         | 0.9164 | 0.7975 |        |
|                                               | glycerol 3-phosphate (G3P)                                   | 2.67                                                         | 0.0000 | 0.0002 |        |
| Inositol metabolism                           | glycerophosphorylcholine (GPC)                               | 2.48                                                         | 0.0000 | 0.0002 |        |
|                                               | myo-inositol                                                 | 1.10                                                         | 0.6454 | 0.7543 |        |
|                                               | inositol 1-phosphate (I1P)                                   | 1.01                                                         | 0.9612 | 0.8015 |        |
|                                               | scyllo-inositol                                              | 1.12                                                         | 0.8466 | 0.7822 |        |
|                                               | 1-palmitoylglycerophosphoethanolamine                        | 0.87                                                         | 0.1867 | 0.7021 |        |
|                                               | 1-stearoylglycerophosphoethanolamine                         | 0.72                                                         | 0.5376 | 0.7509 |        |
|                                               | 1-oleoylglycerophosphoethanolamine                           | 1.05                                                         | 0.6975 | 0.7543 |        |
|                                               | 2-oleoylglycerophosphoethanolamine*                          | 0.98                                                         | 0.9418 | 0.8015 |        |
|                                               | 1-arachidonoylglycerophosphoethanolamine*                    | 1.01                                                         | 0.8829 | 0.7822 |        |
|                                               | 2-arachidonoylglycerophosphoethanolamine*                    | 1.02                                                         | 0.9193 | 0.7975 |        |
| 2-docosapentaenoylglycerophosphoethanolamine* | 0.85                                                         | 0.2047                                                       | 0.7078 |        |        |

|                                 |                                                      |                                              |                                      |        |        |        |
|---------------------------------|------------------------------------------------------|----------------------------------------------|--------------------------------------|--------|--------|--------|
| Lysolipid                       |                                                      | 2-docosahexaenoylglycerophosphoethanolamine* | 0.91                                 | 0.2468 | 0.7078 |        |
|                                 |                                                      | 1-myristoylglycerophosphocholine             | 0.85                                 | 0.3054 | 0.7285 |        |
|                                 |                                                      | 2-myristoylglycerophosphocholine*            | 0.97                                 | 0.7063 | 0.7543 |        |
|                                 |                                                      | 1-pentadecanoylglycerophosphocholine*        | 0.99                                 | 0.8378 | 0.7822 |        |
|                                 |                                                      | 1-palmitoylglycerophosphocholine             | 1.04                                 | 0.7580 | 0.7592 |        |
|                                 |                                                      | 2-palmitoylglycerophosphocholine*            | 0.95                                 | 0.5718 | 0.7543 |        |
|                                 |                                                      | 1-palmitoleoylglycerophosphocholine*         | 1.34                                 | 0.3825 | 0.7285 |        |
|                                 |                                                      | 2-palmitoleoylglycerophosphocholine*         | 0.98                                 | 0.7149 | 0.7543 |        |
|                                 |                                                      | 1-heptadecanoylglycerophosphocholine         | 0.94                                 | 0.7189 | 0.7543 |        |
|                                 |                                                      | 1-stearoylglycerophosphocholine              | 0.92                                 | 0.8984 | 0.7907 |        |
|                                 |                                                      | 1-oleoylglycerophosphocholine                | 0.95                                 | 0.7263 | 0.7563 |        |
|                                 |                                                      | 2-oleoylglycerophosphocholine*               | 1.02                                 | 0.9053 | 0.7929 |        |
|                                 |                                                      | 1-linoleoylglycerophosphocholine             | 0.96                                 | 0.7036 | 0.7543 |        |
|                                 |                                                      | 2-linoleoylglycerophosphocholine*            | 1.04                                 | 0.9605 | 0.8015 |        |
|                                 |                                                      | 2-arachidonoylglycerophosphocholine*         | 1.09                                 | 0.7352 | 0.7573 |        |
|                                 |                                                      | 2-docosapentaenoylglycerophosphocholine*     | 1.09                                 | 0.7123 | 0.7543 |        |
|                                 |                                                      | 1-palmitoleoylglycerophosphoinositol*        | 1.14                                 | 0.7198 | 0.7543 |        |
|                                 |                                                      | 1-stearoylglycerophosphoinositol             | 1.17                                 | 0.6970 | 0.7543 |        |
|                                 |                                                      | 1-arachidonoylglycerophosphoinositol*        | 1.11                                 | 0.4287 | 0.7285 |        |
|                                 |                                                      | 1-oleoylglycerophosphoserine                 | 0.87                                 | 0.3974 | 0.7285 |        |
|                                 |                                                      | 1-palmitoylplasménylethanolamine*            | 0.91                                 | 0.3452 | 0.7285 |        |
|                                 | Monoacylglycerol                                     |                                              | 1-palmitoylglycerol (1-monopalmitin) | 1.06   | 0.7965 | 0.7806 |
|                                 |                                                      |                                              | 2-palmitoylglycerol (2-monopalmitin) | 1.04   | 0.7626 | 0.7597 |
|                                 |                                                      |                                              | 1-stearoylglycerol (1-monostearin)   | 1.06   | 0.7454 | 0.7573 |
|                                 |                                                      |                                              | 1-oleoylglycerol (1-monolein)        | 0.85   | 0.3174 | 0.7285 |
|                                 |                                                      |                                              | 1-linoleoylglycerol (1-monolinolein) | 0.91   | 0.6338 | 0.7543 |
|                                 | Sphingolipid                                         |                                              | sphinganine                          | 0.88   | 0.6619 | 0.7543 |
|                                 |                                                      |                                              | sphingosine                          | 1.05   | 0.8626 | 0.7822 |
|                                 |                                                      |                                              | palmitoyl sphingomyelin              | 1.09   | 0.4351 | 0.7285 |
|                                 |                                                      | stearoyl sphingomyelin                       | 1.30                                 | 0.2558 | 0.7078 |        |
| Sterol/Steroid                  |                                                      | lathosterol                                  | 1.09                                 | 0.5237 | 0.7509 |        |
|                                 |                                                      | cholesterol                                  | 1.14                                 | 0.2439 | 0.7078 |        |
|                                 |                                                      | 7-dehydrocholesterol                         | 1.50                                 | 0.2221 | 0.7078 |        |
|                                 |                                                      | 7-alpha-hydroxycholesterol                   | 0.87                                 | 0.4806 | 0.7400 |        |
|                                 |                                                      | 7-beta-hydroxycholesterol                    | 1.09                                 | 0.8480 | 0.7822 |        |
| Nucleotide                      | Purine metabolism, (hypo)xanthine/inosine containing | xanthine                                     | 0.98                                 | 0.6600 | 0.7543 |        |
|                                 |                                                      | hypoxanthine                                 | 0.90                                 | 0.1778 | 0.7021 |        |
|                                 |                                                      | inosine                                      | 1.10                                 | 0.4809 | 0.7400 |        |
|                                 | Purine metabolism, adenine containing                | adenine                                      | 0.78                                 | 0.2015 | 0.7078 |        |
|                                 |                                                      | adenosine                                    | 1.00                                 | 0.9638 | 0.8015 |        |
|                                 | Purine metabolism, guanine containing                | guanine                                      | 1.39                                 | 0.3866 | 0.7285 |        |
|                                 |                                                      | guanosine                                    | 1.71                                 | 0.1176 | 0.6459 |        |
|                                 | Pyrimidine metabolism, cytidine containing           | cytidine                                     | 1.31                                 | 0.1179 | 0.6459 |        |
|                                 | Pyrimidine metabolism, orotate containing            | orotate                                      | 0.62                                 | 0.1389 | 0.6459 |        |
|                                 | Pyrimidine metabolism, thymine containing            | thymidine                                    | 0.94                                 | 0.2769 | 0.7248 |        |
|                                 |                                                      | uracil                                       | 0.72                                 | 0.0015 | 0.0669 |        |
|                                 |                                                      | uridine                                      | 1.18                                 | 0.0808 | 0.5662 |        |
|                                 |                                                      | pseudouridine                                | 0.86                                 | 0.5430 | 0.7509 |        |
| Cofactors and vitamins          | Nicotinate and nicotinamide metabolism               | nicotinamide                                 | 0.97                                 | 0.8149 | 0.7822 |        |
|                                 |                                                      | nicotinamide ribonucleotide (NMN)            | 1.40                                 | 0.1373 | 0.6459 |        |
|                                 |                                                      | nicotinamide adenine dinucleotide (NAD+)     | 1.17                                 | 0.8715 | 0.7822 |        |
|                                 |                                                      | nicotinamide riboside*                       | 0.85                                 | 0.2087 | 0.7078 |        |
|                                 |                                                      | adenosine 5'diphosphoribose                  | 1.91                                 | 0.0213 | 0.2941 |        |
|                                 |                                                      | nicotinate ribonucleoside*                   | 0.70                                 | 0.0152 | 0.2290 |        |
|                                 | Pantothenate and CoA metabolism                      | pantothenate                                 | 1.07                                 | 0.6977 | 0.7543 |        |
|                                 |                                                      | phosphopantetheine                           | 0.82                                 | 0.1387 | 0.6459 |        |
|                                 |                                                      | coenzyme A                                   | 1.56                                 | 0.3613 | 0.7285 |        |
|                                 | Riboflavin metabolism                                | flavin adenine dinucleotide (FAD)            | 1.12                                 | 0.2732 | 0.7248 |        |
|                                 |                                                      | riboflavin (Vitamin B2)                      | 0.90                                 | 0.3706 | 0.7285 |        |
|                                 |                                                      | flavin mononucleotide (FMN)                  | 0.71                                 | 0.0649 | 0.5348 |        |
|                                 | Thiamine metabolism                                  | thiamin (Vitamin B1)                         | 0.82                                 | 0.3791 | 0.7285 |        |
|                                 | Tocopherol metabolism                                | alpha-tocopherol                             | 2.81                                 | 0.0836 | 0.5662 |        |
|                                 | Vitamin B6 metabolism                                | pyridoxamine                                 | 0.96                                 | 0.5079 | 0.7509 |        |
| Xenobiotics                     | Benzoate metabolism                                  | benzoate                                     | 1.19                                 | 0.3342 | 0.7285 |        |
|                                 |                                                      | glycolate (hydroxyacetate)                   | 0.97                                 | 0.9861 | 0.8089 |        |
|                                 | Chemical                                             | glycerol 2-phosphate                         | 1.20                                 | 0.6572 | 0.7543 |        |
|                                 |                                                      | HEPES                                        | 1.09                                 | 0.5310 | 0.7509 |        |
|                                 |                                                      | phenol red                                   | 1.18                                 | 0.2453 | 0.7078 |        |
|                                 | Drug                                                 | penicillin G                                 | 1.28                                 | 0.1006 | 0.6287 |        |
| Sugar, sugar substitute, starch |                                                      | erythritol                                   | 1.09                                 | 0.6738 | 0.7543 |        |

| Symbol | Unigene   | Description                                                  | Fold Regulation<br>(HuR IP vs. IgG IP) | p-value  |
|--------|-----------|--------------------------------------------------------------|----------------------------------------|----------|
| ACLY   | Hs.387567 | ATP citrate lyase                                            | 1.5429                                 | 0.648673 |
| ACO1   | Hs.567229 | Aconitase 1, soluble                                         | -42.206                                | 0.355898 |
| ACO2   | Hs.643610 | Aconitase 2, mitochondrial                                   | -6.6202                                | 0.146843 |
| AGL    | Hs.904    | Amylo-alpha-1, 6-glucosidase, 4-alpha-glucanotransferase     | -9.5095                                | 0.052489 |
| ALDOA  | Hs.513490 | Aldolase A, fructose-bisphosphate                            | -2.1501                                | 0.235413 |
| ALDOB  | Hs.530274 | Aldolase B, fructose-bisphosphate                            | -10.7919                               | 0.154068 |
| ALDOC  | Hs.155247 | Aldolase C, fructose-bisphosphate                            | -12.0995                               | 0.152609 |
| BPGM   | Hs.198365 | 2,3-bisphosphoglycerate mutase                               | -1.4968                                | 0.251449 |
| CS     | Hs.430606 | Citrate synthase                                             | 4.9524                                 | 0.00311  |
| DLAT   | Hs.335551 | Dihydrolipoamide S-acetyltransferase                         | 1.6224                                 | 0.516277 |
| DLD    | Hs.131711 | Dihydrolipoamide dehydrogenase                               | -1.7434                                | 0.275389 |
| DLST   | Hs.525459 | Dihydrolipoamide S-succinyltransferase                       | -2.1058                                | 0.168569 |
| ENO1   | Hs.517145 | Enolase 1, (alpha)                                           | 1.2884                                 | 0.884119 |
| ENO2   | Hs.511915 | Enolase 2 (gamma, neuronal)                                  | 3.5079                                 | 0.101815 |
| ENO3   | Hs.224171 | Enolase 3 (beta, muscle)                                     | -4.0191                                | 0.552746 |
| FBP1   | Hs.494496 | Fructose-1,6-bisphosphatase 1                                | -12.0995                               | 0.152609 |
| FBP2   | Hs.61255  | Fructose-1,6-bisphosphatase 2                                | -12.0995                               | 0.152609 |
| FH     | Hs.592490 | Fumarate hydratase                                           | -2.4741                                | 0.36243  |
| G6PC   | Hs.212293 | Glucose-6-phosphatase, catalytic subunit                     | -12.0995                               | 0.152609 |
| G6PC3  | Hs.294005 | Glucose 6 phosphatase, catalytic, 3                          | -6.6317                                | 0.156572 |
| G6PD   | Hs.461047 | Glucose-6-phosphate dehydrogenase                            | -2.712                                 | 0.571444 |
| GALM   | Hs.435012 | Galactose mutarotase (aldose 1-epimerase)                    | -12.0995                               | 0.152609 |
| GBE1   | Hs.436062 | Glucan (1,4-alpha-), branching enzyme 1                      | 16.6578                                | 0.000815 |
| GCK    | Hs.1270   | Glucokinase (hexokinase 4)                                   | -12.0995                               | 0.152609 |
| GPI    | Hs.466471 | Glucose-6-phosphate isomerase                                | 17.0965                                | 0.012038 |
| GSK3A  | Hs.466828 | Glycogen synthase kinase 3 alpha                             | -2.0165                                | 0.24973  |
| GSK3B  | Hs.445733 | Glycogen synthase kinase 3 beta                              | 5.951                                  | 0.003484 |
| GYS1   | Hs.386225 | Glycogen synthase 1 (muscle)                                 | -2.1278                                | 0.189744 |
| GYS2   | Hs.82614  | Glycogen synthase 2 (liver)                                  | -27.8938                               | 0.083152 |
| H6PD   | Hs.463511 | Hexose-6-phosphate dehydrogenase (glucose 1-dehydrogenase)   | -1.1383                                | 0.644551 |
| HK2    | Hs.406266 | Hexokinase 2                                                 | 4.0506                                 | 0.009529 |
| HK3    | Hs.411695 | Hexokinase 3 (white cell)                                    | -9.9306                                | 0.186428 |
| IDH1   | Hs.593422 | Isocitrate dehydrogenase 1 (NADP+), soluble                  | 11.7584                                | 0.008953 |
| IDH2   | Hs.596461 | Isocitrate dehydrogenase 2 (NADP+), mitochondrial            | -2.9936                                | 0.20309  |
| IDH3A  | Hs.591110 | Isocitrate dehydrogenase 3 (NAD+) alpha                      | 5.8083                                 | 0.035195 |
| IDH3B  | Hs.436405 | Isocitrate dehydrogenase 3 (NAD+) beta                       | -1.1723                                | 0.616736 |
| IDH3G  | Hs.410197 | Isocitrate dehydrogenase 3 (NAD+) gamma                      | -2.3004                                | 0.076171 |
| MDH1   | Hs.526521 | Malate dehydrogenase 1, NAD (soluble)                        | 1.0393                                 | 0.624689 |
| MDH1B  | Hs.147816 | Malate dehydrogenase 1B, NAD (soluble)                       | -12.0995                               | 0.152609 |
| MDH2   | Hs.520967 | Malate dehydrogenase 2, NAD (mitochondrial)                  | -1.2221                                | 0.52908  |
| OGDH   | Hs.488181 | Oxoglutarate (alpha-ketoglutarate) dehydrogenase (lipoamide) | -1.274                                 | 0.964913 |
| PC     | Hs.89890  | Pyruvate carboxylase                                         | -7.474                                 | 0.158238 |
| PCK1   | Hs.1872   | Phosphoenolpyruvate carboxykinase 1 (soluble)                | -12.0995                               | 0.152609 |
| PCK2   | Hs.75812  | Phosphoenolpyruvate carboxykinase 2 (mitochondrial)          | -1.9648                                | 0.09237  |
| PDHA1  | Hs.530331 | Pyruvate dehydrogenase (lipoamide) alpha 1                   | -1.1703                                | 0.825068 |
| PDHB   | Hs.161357 | Pyruvate dehydrogenase (lipoamide) beta                      | -1.4063                                | 0.348239 |

|         |           |                                                               |          |          |
|---------|-----------|---------------------------------------------------------------|----------|----------|
| PKD1    | Hs.470633 | Pyruvate dehydrogenase kinase, isozyme 1                      | -1.111   | 0.343281 |
| PKD2    | Hs.256667 | Pyruvate dehydrogenase kinase, isozyme 2                      | -12.0995 | 0.152609 |
| PKD3    | Hs.658190 | Pyruvate dehydrogenase kinase, isozyme 3                      | 3.1126   | 0.28424  |
| PKD4    | Hs.8364   | Pyruvate dehydrogenase kinase, isozyme 4                      | -4.2043  | 0.785768 |
| PDP2    | Hs.654693 | Pyruvate dehydrogenase phosphatase catalytic subunit 2        | 2.0858   | 0.734256 |
| PDPR    | Hs.655245 | Pyruvate dehydrogenase phosphatase regulatory subunit         | -4.7219  | 0.058316 |
| PFKL    | Hs.255093 | Phosphofructokinase, liver                                    | -2.4741  | 0.190138 |
| PGAM2   | Hs.632642 | Phosphoglycerate mutase 2 (muscle)                            | -5.7135  | 0.108531 |
| PGK1    | Hs.78771  | Phosphoglycerate kinase 1                                     | 11.4766  | 0.001123 |
| PGK2    | Hs.367727 | Phosphoglycerate kinase 2                                     | -12.0995 | 0.152609 |
| PGLS    | Hs.466165 | 6-phosphogluconolactonase                                     | -5.0433  | 0.002385 |
| PGM1    | Hs.1869   | Phosphoglucomutase 1                                          | -2.3004  | 0.107363 |
| PGM2    | Hs.23363  | Phosphoglucomutase 2                                          | -1.1887  | 0.601879 |
| PGM3    | Hs.708038 | Phosphoglucomutase 3                                          | -2.4612  | 0.202776 |
| PHKA1   | Hs.201379 | Phosphorylase kinase, alpha 1 (muscle)                        | -7.1323  | 0.246618 |
| PHKB    | Hs.78060  | Phosphorylase kinase, beta                                    | -2.5524  | 0.047759 |
| PHKG1   | Hs.715728 | Phosphorylase kinase, gamma 1 (muscle)                        | -8.6751  | 0.864583 |
| PHKG2   | Hs.196177 | Phosphorylase kinase, gamma 2 (testis)                        | -9.0278  | 0.154681 |
| PKLR    | Hs.95990  | Pyruvate kinase, liver and RBC                                | -9.7431  | 0.380653 |
| PRPS1   | Hs.56     | Phosphoribosyl pyrophosphate synthetase 1                     | 1.6028   | 0.192061 |
| PRPS1L1 | Hs.169284 | Phosphoribosyl pyrophosphate synthetase 1-like 1              | -12.0995 | 0.152609 |
| PRPS2   | Hs.654581 | Phosphoribosyl pyrophosphate synthetase 2                     | 33.4312  | 0.00292  |
| PYGL    | Hs.282417 | Phosphorylase, glycogen, liver                                | -1.875   | 0.312615 |
| PYGM    | Hs.154084 | Phosphorylase, glycogen, muscle                               | -12.0995 | 0.152609 |
| RBKS    | Hs.11916  | Ribokinase                                                    | -3.3738  | 0.174636 |
| RPE     | Hs.282260 | Ribulose-5-phosphate-3-epimerase                              | 6.345    | 0.023711 |
| RPIA    | Hs.469264 | Ribose 5-phosphate isomerase A                                | 11.4171  | 0.03605  |
| SDHA    | Hs.440475 | Succinate dehydrogenase complex, subunit A, flavoprotein (Fp) | 2.0358   | 0.029163 |
| SDHB    | Hs.465924 | Succinate dehydrogenase complex, subunit B, iron sulfur (Ip)  | -2.7073  | 0.11042  |
| SDHC    | Hs.444472 | Succinate dehydrogenase complex, subunit C                    | 2.0895   | 0.54811  |
| SDHD    | Hs.356270 | Succinate dehydrogenase complex, subunit D                    | -1.6869  | 0.227871 |
| SUCLA2  | Hs.546323 | Succinate-CoA ligase, ADP-forming, beta subunit               | -1.1033  | 0.80614  |
| SUCLG1  | Hs.270428 | Succinate-CoA ligase, alpha subunit                           | -1.5046  | 0.269024 |
| SUCLG2  | Hs.655250 | Succinate-CoA ligase, GDP-forming, beta subunit               | -1.4038  | 0.417678 |
| TALDO1  | Hs.438678 | Transaldolase 1                                               | -1.0584  | 0.737969 |
| TKT     | Hs.89643  | Transketolase                                                 | -2.02    | 0.399791 |
| TPI1    | Hs.524219 | Triosephosphate isomerase 1                                   | 1.6767   | 0.899637 |
| UGP2    | Hs.516217 | UDP-glucose pyrophosphorylase 2                               | -2.1426  | 0.066812 |
| B2M     | Hs.534255 | Beta-2-microglobulin                                          | -2.1538  | 0.170991 |
| HPRT1   | Hs.412707 | Hypoxanthine phosphoribosyltransferase 1                      | 2.4848   | 0.050776 |
| RPL13A  | Hs.728776 | Ribosomal protein L13a                                        | -1.4112  | 0.742701 |
| GAPDH   | Hs.592355 | Glyceraldehyde-3-phosphate dehydrogenase                      | 1.2232   | 0.740027 |
| ACTB    | Hs.520640 | Actin, beta                                                   | 836.4439 | 0.000207 |
